# Supplementary material
Source: PubMed Central journal article supplement (PMC8647100)

**Time to Progression and AFP Response**

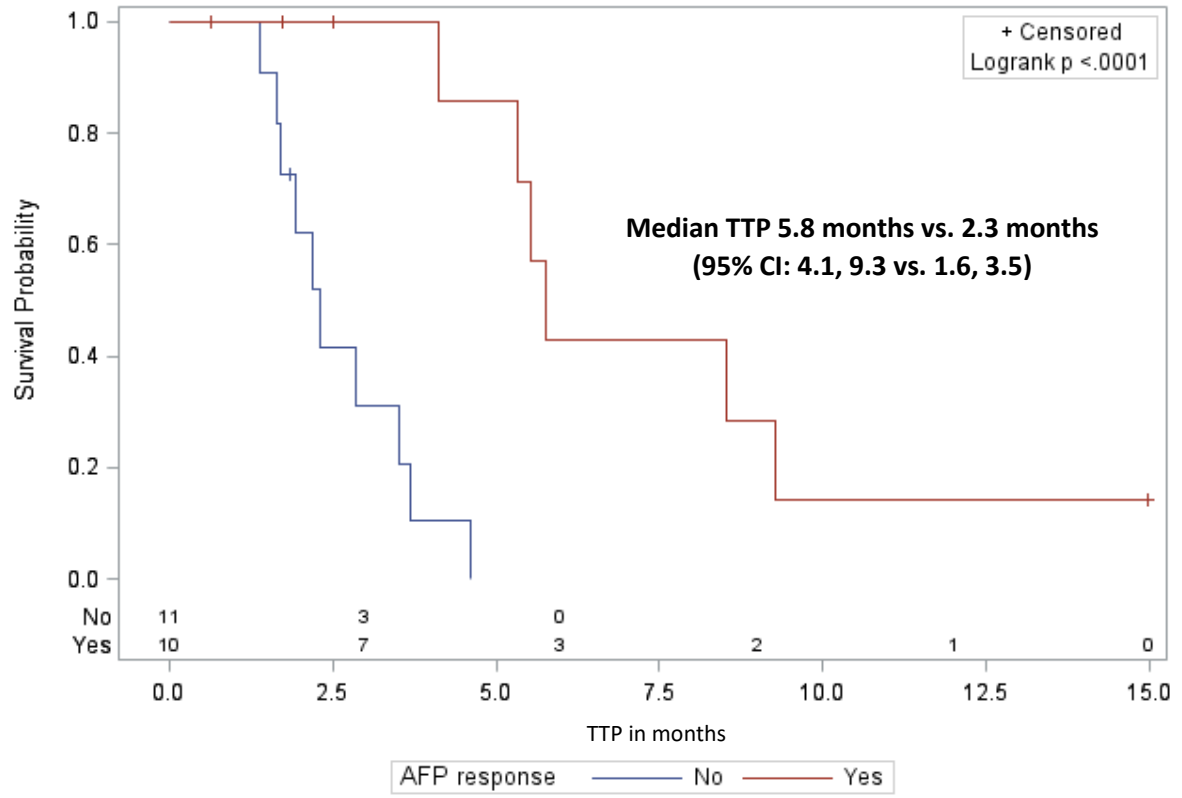

Supplement: lic-0010-0561-s01.pdf [file lic-0010-0561-s01.pdf]

### Overall Survival and AFP Response

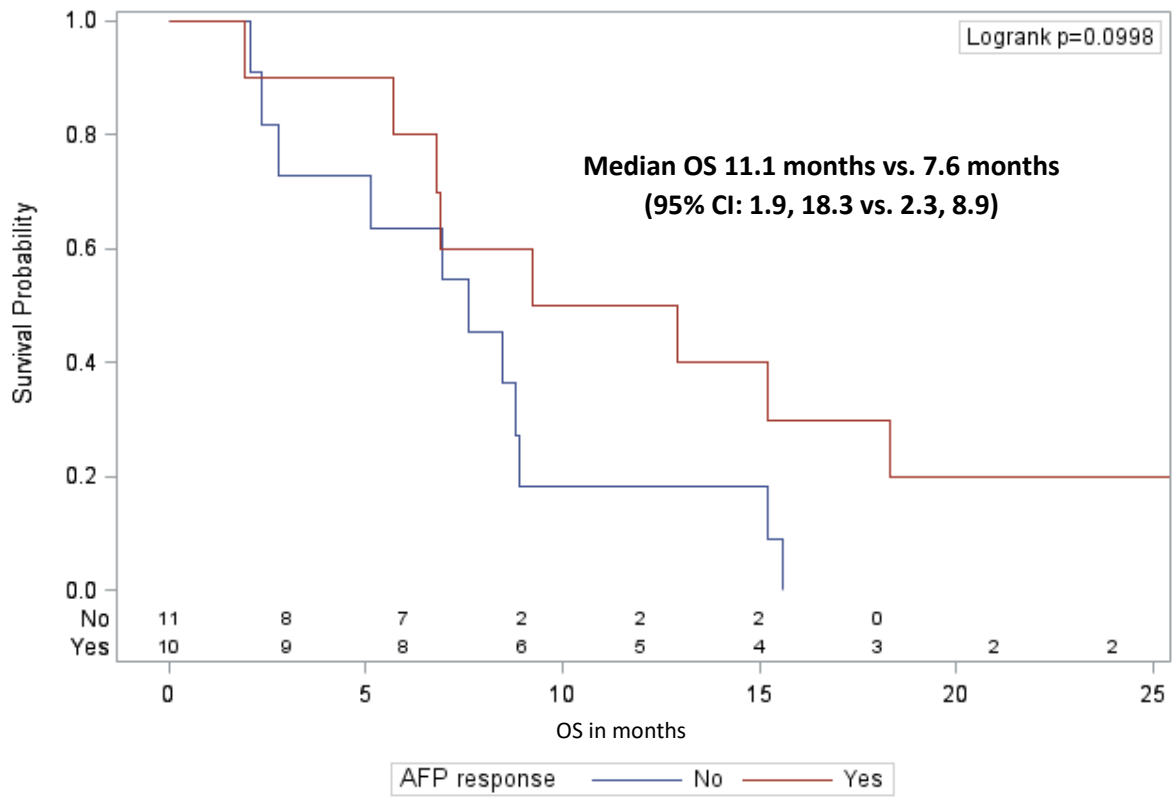

Supplement: lic-0010-0561-s02.pdf [file lic-0010-0561-s02.pdf]
